# Supplementary material for: Requirement for an Otopetrin-like protein for acid taste in Drosophila
Source: PubMed Central journal article supplement — Proc Natl Acad Sci U S A. 2021 Dec 15;118(51):e2110641118. doi: 10.1073/pnas.2110641118 (PMC8713817; doi:10.1073/pnas.2110641118), 2021-12-15
Supplement: pnas.2110641118.sapp.pdf [file pnas.2110641118.sapp.pdf]

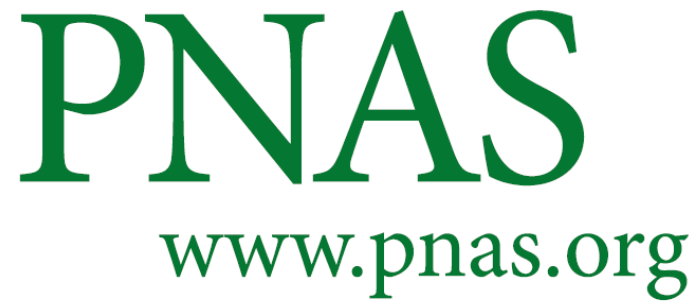

**Supplementary Information for**  
Requirement for an Otopetrin-Like protein for acid taste in *Drosophila*

Anindya Ganguly, Avinash Chandel, Heather Turner, Shan Wang, Emily Liman and  
Craig Montell.

Craig Montell  
Email: [cmontell@ucsb.edu](mailto:cmontell@ucsb.edu)

**This PDF file includes:**

Figures S1 to S4

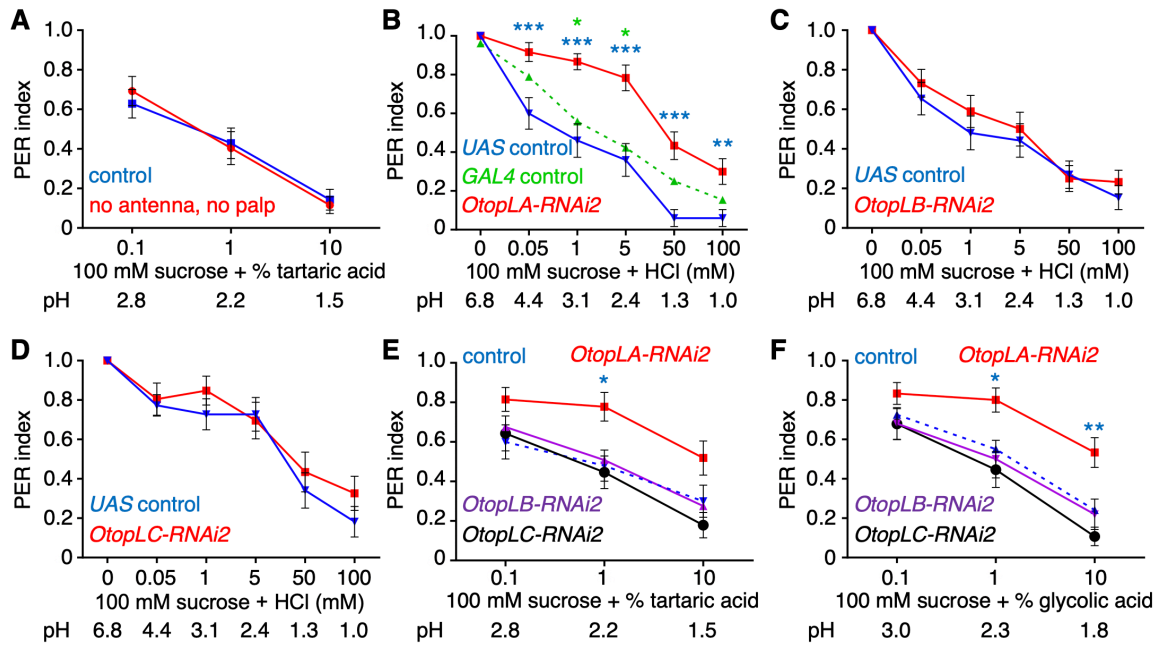

**Fig. S1.** Screen with second set of RNAi lines further supports that *OtopLA* is required for aversion of acid taste. PER assays using either 100 mM sucrose alone or sucrose plus the indicated concentrations of HCl (mM) or organic acids (%). All RNAi lines (B–F) were generated by crossing the indicated *UAS-RNAi* lines to *elav-GAL4;UAS-Dcr2* flies. (A) Effects of removing olfactory organs on the PER responses to the indicated concentrations of tartaric acid. The *w<sup>1118</sup>* flies (intact flies) and the *w<sup>1118</sup>* flies in which the antenna and maxillary palp were surgically removed (no antenna, no palp). Intact flies, n=35. No antenna and no maxillary palp, n=26. (B–F) Effects of RNAi knockdown of different *OtopL* genes on the PER responses to the indicated acids. (B) Effect of knockdown with *OtopLA-RNAi2* on the PER to sucrose plus HCl. *OtopLA-RNAi2* is *UAS-OtopLA-RNAi2* (v100847) crossed to *elav-GAL4;UAS-Dcr2* flies (n=32). The *UAS* control (n=26) and *GAL4* control (n=25) were generated by crossing *w<sup>1118</sup>* to either *UAS-OtopLA-RNAi2* or *elav-GAL4;UAS-Dcr2*, respectively. The blue and green asterisks indicate statistically significant differences between *OtopLA* silenced flies and the *UAS* and *GAL4* controls, respectively. The results with the *GAL4* control (green dotted line) are the same as that used in Fig. 1B. (C) Effect of knockdown with *OtopLB-RNAi2* on the PER to sucrose plus HCl. *OtopLB-RNAi2* is *UAS-OtopLB-RNAi2* (v3452) crossed to *elav-GAL4;UAS-Dcr2* flies (n=27). *UAS* control (n=26). (D) Effect of knockdown of *OtopLC-RNAi2* on the PER to sucrose plus HCl. *OtopLC-RNAi2* is *UAS-OtopLC-RNAi2* (v19613) crossed to *elav-GAL4;UAS-Dcr2* flies (n=26). *UAS* control (n=27). (E) Effect of knockdown with *OtopLA-RNAi2* (n=30), *OtopLB-RNAi2* (n=25) and *OtopLC-RNAi2* (n=28) on PERs using the indicated concentrations of tartaric acid. *OtopLA-RNAi1* (n=30), *OtopLB-RNAi1* (n=25), *OtopLC-RNAi1* (n=28). The *GAL4* “control” is *elav-GAL4;UAS-Dcr2* flies (n= 65) and is also presented in Fig. 1E. The blue asterisks indicate significant differences from the control. (F) Effect of knockdown with *OtopLA-RNAi2* (n=30), *OtopLB-RNAi2* (n=25) and *OtopLC-RNAi2* (n=28) on PERs using the indicated concentrations of glycolic acid. The *GAL4* “control” is *elav-GAL4;UAS-Dcr2* flies (n= 65) and is also presented in Fig. 1F. Mann-Whitney U tests. Error bars, s.e.m.s. \*p < 0.05, \*\*p < 0.01, and \*\*\*p < 0.001.

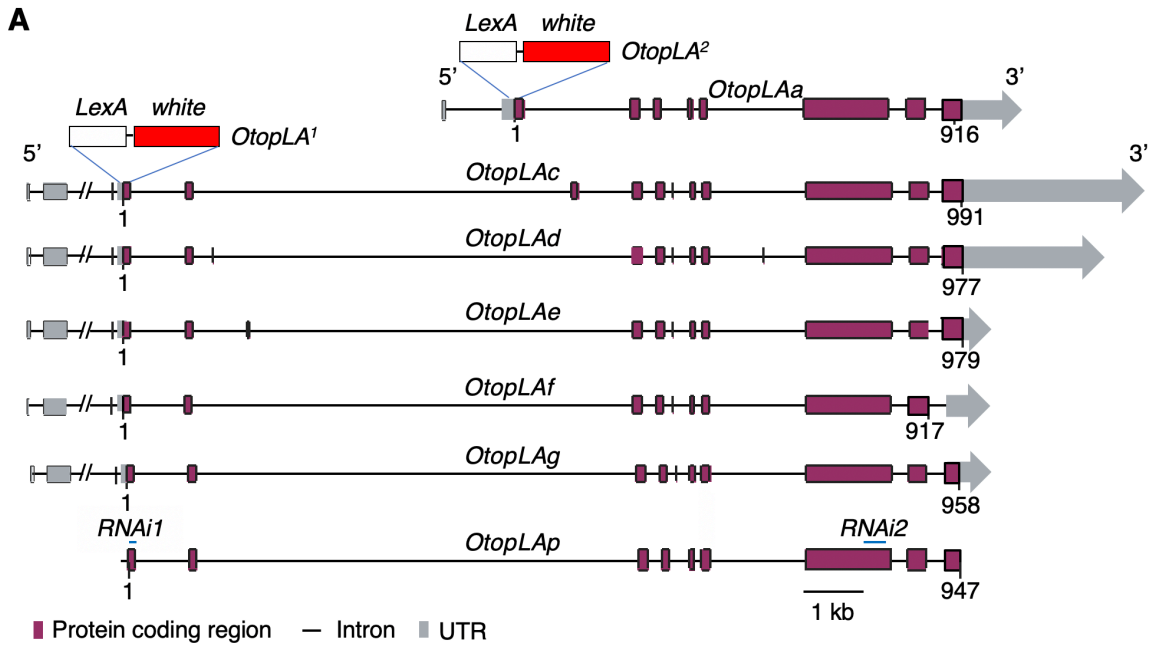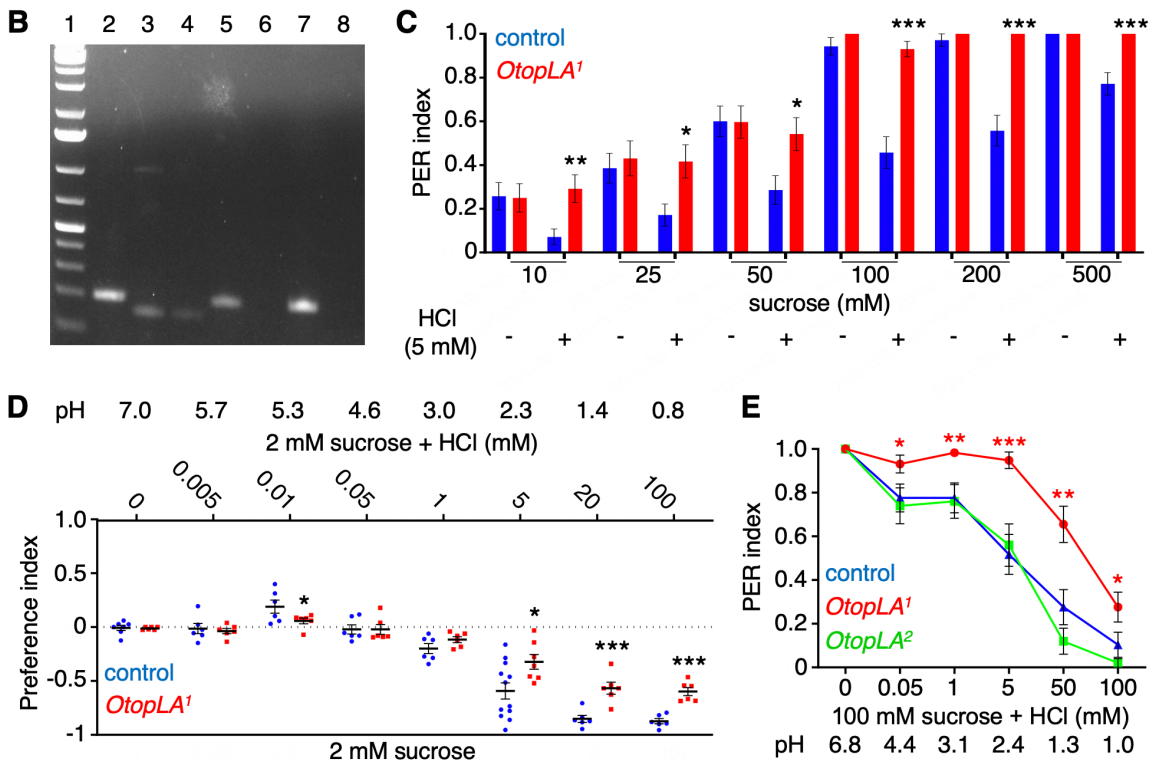

**Fig. S2.** *OtopLA* mRNA isoforms and structures of *OtopLA<sup>1</sup>* and *OtopLA<sup>2</sup>* mutants. (A) Schematic of the *OtopLA* isoforms and the *OtopLA<sup>1</sup>* and *OtopLA<sup>2</sup>* mutants. The protein coding exons are indicated in purple and the horizontal lines indicate introns. To create *OtopLA<sup>1</sup>* the first 40 base pairs of the coding sequence common to *OtopLAc*–*OtopLAg* and *OtopLAp* were replaced with *lexA* and *mini-white*. To generate *OtopLA<sup>2</sup>*, the first 52 base pairs of the coding region of *OtopLAA* were replaced with *lexA* and *mini-white*. The regions targeted by *RNAi1* and *RNAi2* are indicated.

(B) RT-PCR using cDNAs synthesized from heads of control, *OtopLA*<sup>1</sup> and *OtopLA*<sup>2</sup>. Lane 1: GeneRuler 1 kb Plus DNA Ladder (Thermo Fisher, SM1331). Lanes 2, 5 and 7 show *syd1* RT-PCR products (192 bp) from control, *OtopLA*<sup>1</sup> and *OtopLA*<sup>2</sup> cDNAs (primers: forward, tctggcgtgcttcgagaag; reverse, cggatccctatgtcaagggt). Lanes 3 and 6 are *OtopLac-p* RT-PCR products using control (143 bp band) and *OtopLA*<sup>1</sup> (no band) cDNAs, respectively (primers: forward, cagcgggtgccctacatt; reverse, ccatcgccctgcagctggtg). Lanes 4 and 8 are *OtopLAa* RT-PCR products from control (141 bp) and *OtopLA*<sup>2</sup> (no band), respectively (primers: forward, atggcgggcggtgaagtgaagggt; reverse, ttccatctcctgttgccgg). (C) PERs elicited by control (*w*<sup>1118</sup>) and *OtopLA*<sup>1</sup> flies in response to stimulation with the indicated concentrations of sucrose with or without 5 mM HCl as indicated. Control (*w*<sup>1118</sup>), n=35. *OtopLA*<sup>1</sup>, n=36. (D) Binary choice assays showing preferences of control (*w*<sup>1118</sup>) and *OtopLA*<sup>1</sup> flies to 2 mM sucrose versus 2 mM sucrose mixed with the indicated concentrations of HCl. n=6—12. (E) PER assays showing that *OtopLA*<sup>2</sup>, which specifically disrupts *OtopLAa*, does not impact on the aversion to HCl. Control (*w*<sup>1118</sup>), n=29. *OtopLA*<sup>1</sup>, n=29. *OtopLA*<sup>2</sup>, n=25. Mann-Whitney U tests. Error bars, s.e.m.s. \*p < 0.05, \*\*p < 0.01, and \*\*\*p < 0.001.

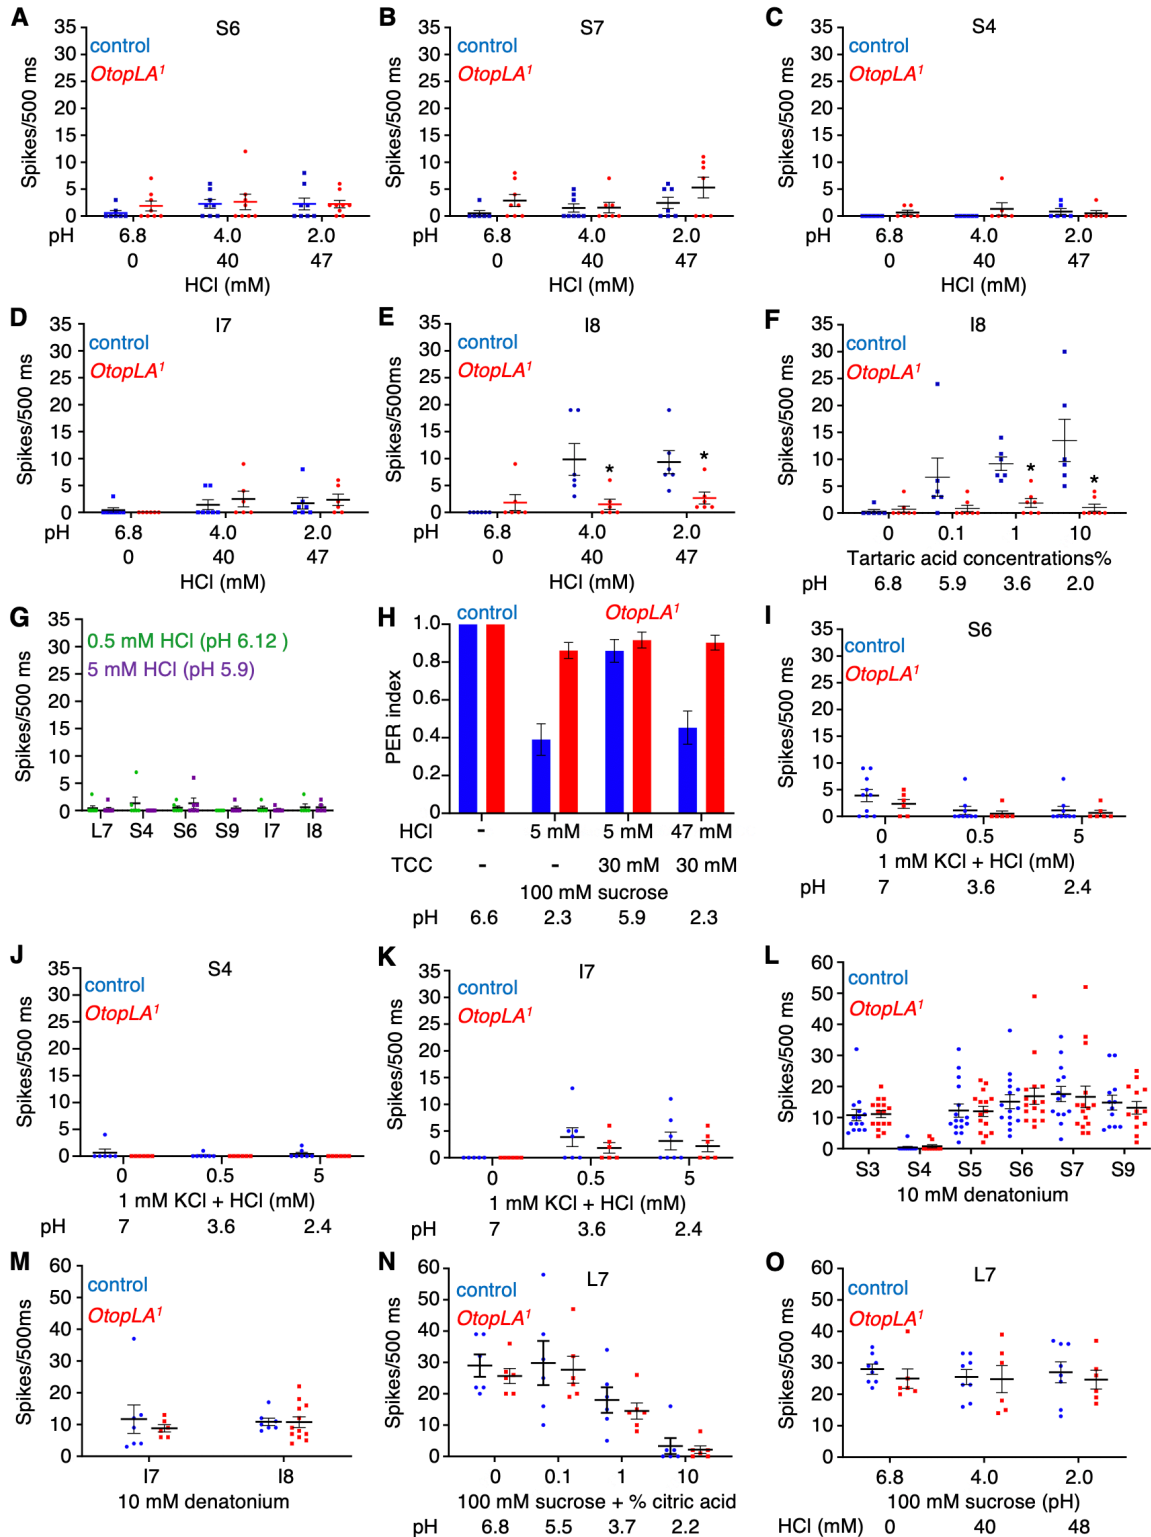

**Fig. S3.** Tip recordings to test responses of control and *OtopLA*<sup>1</sup> sensilla to acids, denatonium and sucrose. Mean action potentials elicited by the control (*w*<sup>1118</sup>) and the *OtopLA*<sup>1</sup> mutant during the first 500 msec upon stimulating the indicated sensilla with the indicated chemical. (A–E) Stimulation of the indicated sensilla with HCl solutions at the indicated pHs. The pH 6.8 solution

contained only the electrolyte (30 mM 3 tricholine citrate). (A) Responses of S6 sensilla to HCl. Control, n=7—8. *OtopLA*<sup>1</sup>, n=8—9. (B) Responses of S7 sensilla to HCl. Control, n=6—8. *OtopLA*<sup>1</sup>, n=6—8. (C) Responses of S4 sensilla to HCl. Control, n=6. *OtopLA*<sup>1</sup>, n=6. (D) Responses of I7 sensilla to HCl. Control, n=7. *OtopLA*<sup>1</sup>, n=6. (E) Responses of I8 sensilla to HCl. Control, n=6. *OtopLA*<sup>1</sup>, n=6. (F) Responses of I8 sensilla to the indicated concentrations of tartaric acid. Control, n=6. *OtopLA*<sup>1</sup>, n=6. (G) Responses of the indicated class of sensilla from control (*w*<sup>1118</sup>) flies to 5 mM HCl and 0.5 mM HCl. n≥5. (H) PERs elicited by control (*w*<sup>1118</sup>) and *OtopLA*<sup>1</sup> flies in response to stimulation with 100 mM sucrose with or without 30 mM TCC (tricholine citrate) mixed with HCl at the indicated concentrations. Control (*w*<sup>1118</sup>), n=32. *OtopLA*<sup>1</sup>, n=35. (I—K) Stimulation of the indicated sensilla with HCl at the indicated concentrations and pHs. 1 mM KCl was used as the electrolyte in all cases. (I) Responses of S6 sensilla to HCl. Control, n=9—10. *OtopLA*<sup>1</sup>, n=6. (J) Responses of S4 sensilla to HCl. Control, n=7. *OtopLA*<sup>1</sup>, n=6. (K) Responses of I7 sensilla to HCl. Control, n=5—7. *OtopLA*<sup>1</sup>, n=6. (L) Responses of the indicated S-type sensilla to 10 mM denatonium. Control, n≥12. *OtopLA*<sup>1</sup>, n≥12. (M) Responses of the indicated I-type sensilla to 10 mM denatonium. Control, n≥6. *OtopLA*<sup>1</sup>, n≥6. (N) Responses of L7 sensilla to 100 mM sucrose mixed with citric acid at the indicated concentrations and pHs. Control, n=6. *OtopLA*<sup>1</sup>, n=6. (O) Responses of L7 sensilla to 100 mM sucrose plus HCl at the indicated pHs. Control, n=8. *OtopLA*<sup>1</sup>, n=6. Student's unpaired *t*-tests. Error bars, s.e.m.s. \**p* < 0.05, \*\**p* < 0.01, and \*\*\**p* < 0.001.

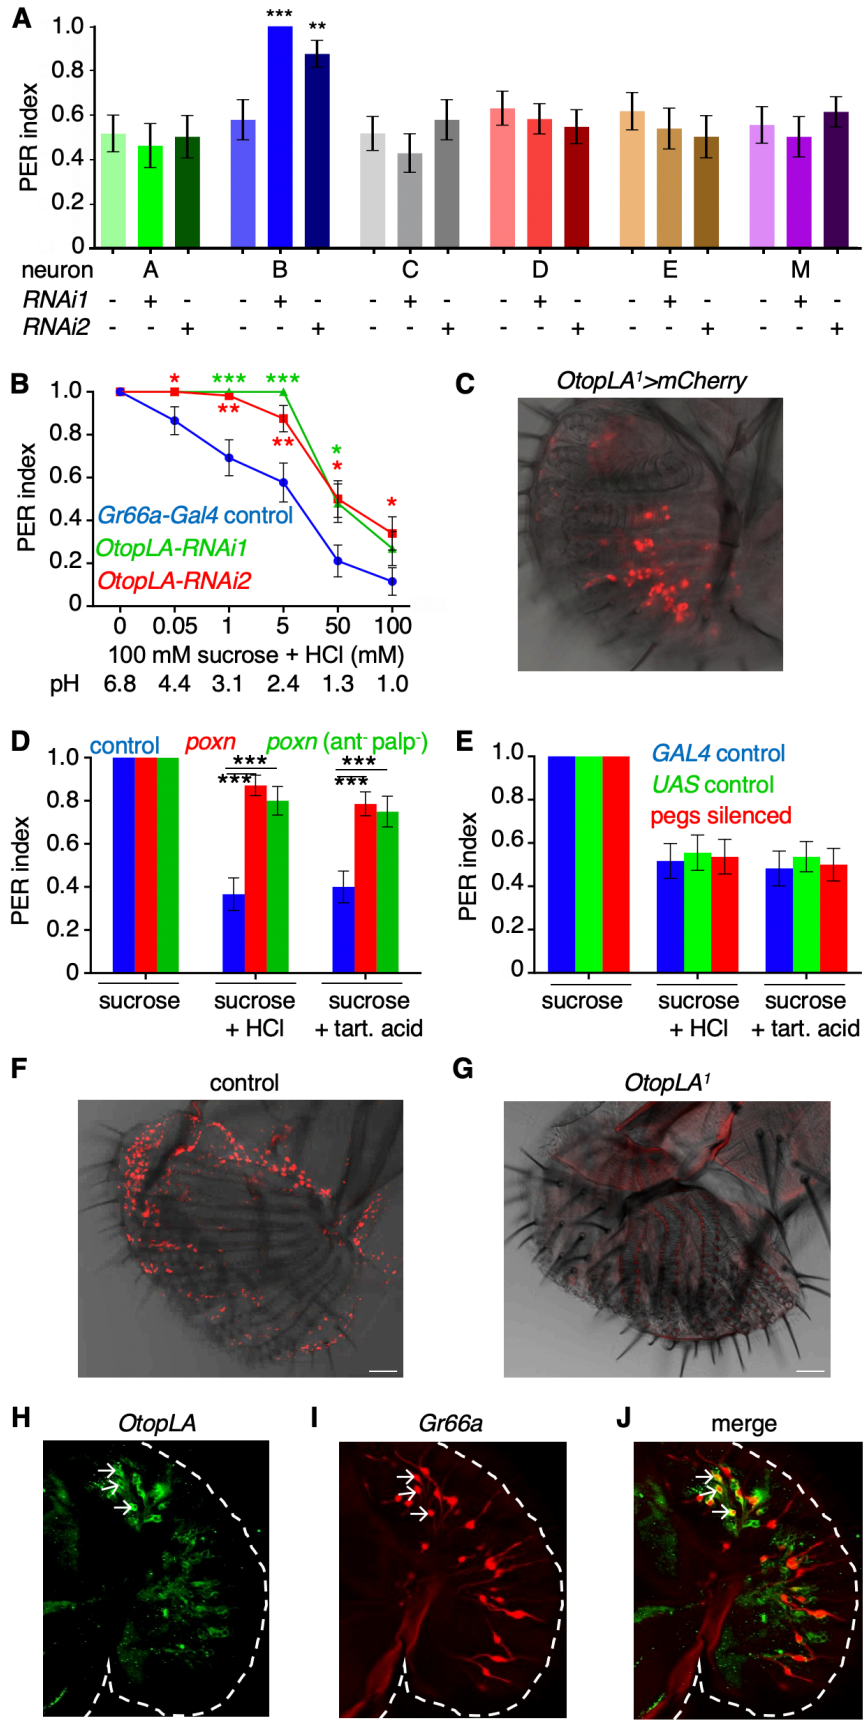

**Fig. S4.** (A) PER assays to test effects on acid aversion after RNAi knockdown of *OtopLA* in different classes of GRNs (A—E) and the mechanosensory (M) neuron associated with taste hairs. PERs were in response to 100 mM sucrose mixed with 5 mM HCl. *OtopLA* was knocked down in A—E GRNs and the M neuron using two independent RNAi lines. *GAL4* lines used to specifically express the RNAi lines in different neurons: *Gr5a-GAL4* for A GRNs, *Gr66a-GAL4* for B GRNs, *ppk28-GAL4* for C GRNs, *ppk23-GAL4* for D GRNs, *Ir94e-GAL4* for E GRNs and *nompC-GAL4* for M neurons. The controls without RNAi lines were the *GAL4* lines crossed to *w<sup>1118</sup>*. n≥25. (B) PER assays to test the effects of RNAi knockdown of *OtopLA* upon stimulation with 100 mM sucrose plus different concentrations of HCl. *Gr66a-GAL4* control, n= 26. *OtopLA-RNAi1*, n= 26. *OtopLA-RNAi2*, n= 28. (C) Confocal image of *OtopLA<sup>1</sup> (lexA)* neurons (red; anti-DsRed) in the labellum. The image focuses on neurons in taste pegs. Genotype: *OtopLA<sup>1</sup>;UAS-mCherry*. (D) PERs elicited by control (*w<sup>1118</sup>*), intact *poxn<sup>70</sup>* flies, and *poxn<sup>70</sup>* flies with the antennae and maxillary palps surgically ablated in response to stimulation with 100 mM sucrose, 100 mM sucrose mixed with either with 5 mM HCl or with 1% tartaric acid. Control, n=30. *poxn<sup>70</sup>* (intact), n=35. *poxn<sup>70</sup>* (antenna-less, maxillary palp-less), n=30. (E) PER elicited from flies in which the peg neurons are silenced show normal aversion to acids. Labella were stimulated with 1) 100 mM sucrose, 2) 100 mM sucrose mixed with 5 mM HCl, or 3) 100 mM sucrose plus 1% tartaric acid. *GAL4* control: *57F03-GAL4/+*, n=29. *UAS* control: *UAS-Kir2.1/+*, n=27. Pegs silenced: *UAS-kir2.1/+;57F03-GAL4/+*, n=27. (F) *In situ* hybridization of *OtopLA* transcripts in a control (*w<sup>1118</sup>*) labellum. Scale bar indicates 10 μm. (G) *In situ* hybridization of *OtopLA* transcripts in an *OtopLA<sup>1</sup>* labellum. Scale bar indicates 10 μm. (H—J) Confocal images testing for overlap between the *OtopLA-LexA* and *Gr66a* reporters. The images focused on neurons in taste hairs. The arrows indicate examples of overlapping expression. (H) *OtopLA<sup>1</sup> (lexA)* was visualized using anti-GFP (green). Genotype: *OtopLA<sup>1</sup>(lexA);Gr66a-GAL4;UAS-tdTomato/lexAop-GFP*. (I) *Gr66a-GAL4* visualized using anti-DsRed (red). Genotype: *OtopLA<sup>1</sup>(lexA);Gr66a-GAL4;UAS-tdTomato/lexAop-GFP*. (J) Merge of G and H. Mann-Whitney U tests. Error bars, s.e.m.s. \*p < 0.05, \*\*p < 0.01, and \*\*\*p < 0.001.
